# Supplementary material for: The mitochondrial genome as an evolutionary storyteller: a journey from dire wolf (Aenocyon dirus) to extant species of Canini (Carnivora: Canidae)
Source: Research Square preprint supplement (doi:10.21203/rs.3.rs-8379789/v1), 2026-01-23
Supplement: Supplementary file 1 [file 0413b0714bc053962d7b5812.xlsx]

## Sheet: S01 - GenBank Sequences
Species	Accession
Canis aureus	NC_067757
Canis latrans	NC_008093
Canis lupaster	NC_27956
Canis lupus familiaris	NC_002008
Canis lupus lupus	NC_009686
Canis lycaon	MZ367897
Canis rufus	NC_062617
Canis simensis	NC_062616
Cerdocyon thous	BK068801
Chrysocyon brachyurus	NC_024172
Cuon alpinus	NC_013445
Lupulella adusta	KT448271
Lupulella mesomelas	KT448280
Lycalopex sechurae	KT448284
Lycalopex sp. CAN003	MN181406
Lycalopex sp. CAN005	MN181407
Lycalopex vetulus	BK068802
Lycaon pictus	NC_028427
Speothos venaticus	NC_053974
Vulpes vulpes	NC_008434

## Sheet: S02 - Dire wolf completion
Gene	DireGWC - This study	DireGWC - Perri et al., 2021	DireARF - This study	DireARF - Perri et al., 2021	DireSP - This study	DireSP - Perri et al., 2021	DireGB - This study	DireGB - Perri et al., 2021
ATP6	1	0.37	0.306902	0	1	0.38	0.358297	0.23
ATP8	1	0.58	0.862745	0.25	1	0.58	0.985294	0.28
COX1	1	0.35	0.633657	0.33	0.994175	0.35	0.630421	0.45
COX2	1	0.96	0.545322	0.32	1	0.76	0.47076	0.63
COX3	1	0.169783	0.146497	0.0199745	1	0.0898854	0.28535	0.0499363
Cytb	1	0.4	0.173684	0.03	0.981579	0.17	0.876316	0.24
ND1	1	0.288182	0.598746	0.0397492	1	0.218621	0.422153	0.298119
ND2	1	0.369291	0.311303	0	1	0.399234	0.806513	0.379272
ND3	1	0.251989	0.890756	0.281064	1	0.222913	0.689076	0.135686
ND4	1	0.51	0.613208	0.36	1	0.4	0.875907	0.32
ND4L	1	0.63	0.727273	0	0.996633	0.41	0.589226	0.26
ND5	1	0.4	0.259198	0.22	0.992861	0.3	0.249314	0.34
ND6	1	0.45	0.295455	0.12	1	0.5	0.774621	0.35

## Sheet: S03 - tRNA annotation
Species	tRNA Type	Start	End	Anticodon	Inf Score	Note
Aenocyon dirus DireGWC	Phe	1	69	GAA	85.1
Aenocyon dirus DireGWC	Val	1025	1091	TAC	101.8
Aenocyon dirus DireGWC	Leu	2673	2747	TAA	124.6
Aenocyon dirus DireGWC	Ile	3706	3774	GAT	124.8
Aenocyon dirus DireGWC	Met	3847	3916	CAT	127
Aenocyon dirus DireGWC	Trp	4959	5026	TCA	99.3
Aenocyon dirus DireGWC	Asp	6969	7036	GTC	112.5
Aenocyon dirus DireGWC	Lys	7737	7803	TTT	105.8
Aenocyon dirus DireGWC	Gly	9430	9498	TCC	95.5
Aenocyon dirus DireGWC	Arg	9846	9914	TCG	106.6
Aenocyon dirus DireGWC	His	11583	11651	GTG	108.2
Aenocyon dirus DireGWC	Ser	11652	11711	GCT	74.4	No D-arm
Aenocyon dirus DireGWC	Leu	11712	11781	TAG	130
Aenocyon dirus DireGWC	Thr	15327	15396	TGT	96.1
Aenocyon dirus DireGWC	Pro	15461	15396	TGG	102.7
Aenocyon dirus DireGWC	Glu	14182	14114	TTC	119.6
Aenocyon dirus DireGWC	Ser	6962	6894	TGA	117.1
Aenocyon dirus DireGWC	Tyr	5350	5283	GTA	110.6
Aenocyon dirus DireGWC	Cys	5282	5216	GCA	88.6
Aenocyon dirus DireGWC	Asn	5181	5110	GTT	111.3
Aenocyon dirus DireGWC	Ala	5108	5040	TGC	110.8
Aenocyon dirus DireGWC	Gln	3845	3772	TTG	106.7

## Sheet: S04 - MtDNA Features
Species	Feature Name	From	To	Strand	Length
Aenocyon dirus DireGWC	tRNA-Phe	1	69	+	69
Aenocyon dirus DireGWC	12S ribosomal RNA	70	1024	+	955
Aenocyon dirus DireGWC	tRNA-Val	1025	1091	+	67
Aenocyon dirus DireGWC	16S ribosomal RNA	1090	2671	+	1582
Aenocyon dirus DireGWC	tRNA-Leu	2673	2747	+	75
Aenocyon dirus DireGWC	ND1	2750	3706	+	957
Aenocyon dirus DireGWC	tRNA-Ile	3706	3774	+	69
Aenocyon dirus DireGWC	tRNA-Gln	3772	3845	-	74
Aenocyon dirus DireGWC	tRNA-Met	3847	3916	+	70
Aenocyon dirus DireGWC	ND2	3917	4960	+	1044
Aenocyon dirus DireGWC	tRNA-Trp	4959	5026	+	68
Aenocyon dirus DireGWC	tRNA-Ala	5040	5108	-	69
Aenocyon dirus DireGWC	tRNA-Asn	5110	5181	-	72
Aenocyon dirus DireGWC	tRNA-Cys	5216	5282	-	67
Aenocyon dirus DireGWC	tRNA-Tyr	5283	5350	-	68
Aenocyon dirus DireGWC	COX1	5352	6896	+	1545
Aenocyon dirus DireGWC	tRNA-Ser	6894	6962	-	69
Aenocyon dirus DireGWC	tRNA-Asp	6969	7036	+	68
Aenocyon dirus DireGWC	COX2	7037	7720	+	684
Aenocyon dirus DireGWC	tRNA-Lys	7737	7803	+	67
Aenocyon dirus DireGWC	ATP8	7805	8008	+	204
Aenocyon dirus DireGWC	ATP6	7966	8646	+	681
Aenocyon dirus DireGWC	COX3	8646	9430	+	785
Aenocyon dirus DireGWC	tRNA-Gly	9430	9498	+	69
Aenocyon dirus DireGWC	ND3	9499	9855	+	357
Aenocyon dirus DireGWC	tRNA-Arg	9846	9914	+	69
Aenocyon dirus DireGWC	ND4L	9915	10211	+	297
Aenocyon dirus DireGWC	ND4	10205	11582	+	1378
Aenocyon dirus DireGWC	tRNA-His	11583	11651	+	69
Aenocyon dirus DireGWC	tRNA-Ser	11652	11711	+	60
Aenocyon dirus DireGWC	tRNA-Leu	11712	11781	+	70
Aenocyon dirus DireGWC	ND5	11782	13602	+	1821
Aenocyon dirus DireGWC	ND6	13586	14113	-	528
Aenocyon dirus DireGWC	tRNA-Glu	14114	14182	-	69
Aenocyon dirus DireGWC	CYTB	14187	15326	+	1140
Aenocyon dirus DireGWC	tRNA-Thr	15327	15396	+	70
Aenocyon dirus DireGWC	tRNA-Pro	15396	15461	-	66
Aenocyon dirus DireGWC	putative control region	15462	16476	+	1015
Atelocynus microtis	tRNA-Phe	1	69	+	69
Atelocynus microtis	12S ribosomal RNA	70	1026	+	957
Atelocynus microtis	tRNA-Val	1027	1093	+	67
Atelocynus microtis	16S ribosomal RNA	1092	2672	+	1581
Atelocynus microtis	tRNA-Leu	2674	2748	+	75
Atelocynus microtis	ND1	2751	3707	+	957
Atelocynus microtis	tRNA-Ile	3707	3775	+	69
Atelocynus microtis	tRNA-Gln	3773	3846	-	74
Atelocynus microtis	tRNA-Met	3848	3917	+	70
Atelocynus microtis	ND2	3918	4961	+	1044
Atelocynus microtis	tRNA-Trp	4960	5027	+	68
Atelocynus microtis	tRNA-Ala	5041	5109	-	69
Atelocynus microtis	tRNA-Asn	5111	5182	-	72
Atelocynus microtis	tRNA-Cys	5217	5284	-	68
Atelocynus microtis	tRNA-Tyr	5285	5351	-	67
Atelocynus microtis	COX1	5353	6897	+	1545
Atelocynus microtis	tRNA-Ser	6895	6963	-	69
Atelocynus microtis	tRNA-Asp	6970	7037	+	68
Atelocynus microtis	COX2	7038	7721	+	684
Atelocynus microtis	tRNA-Lys	7739	7805	+	67
Atelocynus microtis	ATP8	7807	8010	+	204
Atelocynus microtis	ATP6	7968	8648	+	681
Atelocynus microtis	COX3	8648	9432	+	785
Atelocynus microtis	tRNA-Gly	9432	9499	+	68
Atelocynus microtis	ND3	9500	9856	+	357
Atelocynus microtis	tRNA-Arg	9847	9915	+	69
Atelocynus microtis	ND4L	9916	10212	+	297
Atelocynus microtis	ND4	10206	11583	+	1378
Atelocynus microtis	tRNA-His	11584	11652	+	69
Atelocynus microtis	tRNA-Ser	11653	11712	+	60
Atelocynus microtis	tRNA-Leu	11713	11782	+	70
Atelocynus microtis	ND5	11783	13603	+	1821
Atelocynus microtis	ND6	13587	14111	-	525
Atelocynus microtis	tRNA-Glu	14115	14183	-	69
Atelocynus microtis	CYTB	14188	15327	+	1140
Atelocynus microtis	tRNA-Thr	15328	15397	+	70
Atelocynus microtis	tRNA-Pro	15397	15462	-	66
Atelocynus microtis	putative control region	15463	16636	+	1174
Canis aureus	tRNA-Phe	1	69	+	69
Canis aureus	12S ribosomal RNA	70	1023	+	954
Canis aureus	tRNA-Val	1024	1090	+	67
Canis aureus	16S ribosomal RNA	1089	2668	+	1580
Canis aureus	tRNA-Leu	2671	2745	+	75
Canis aureus	ND1	2748	3704	+	957
Canis aureus	tRNA-Ile	3704	3772	+	69
Canis aureus	tRNA-Gln	3770	3843	-	74
Canis aureus	tRNA-Met	3845	3914	+	70
Canis aureus	ND2	3915	4958	+	1044
Canis aureus	tRNA-Trp	4957	5024	+	68
Canis aureus	tRNA-Ala	5038	5106	-	69
Canis aureus	tRNA-Asn	5108	5179	-	72
Canis aureus	tRNA-Cys	5214	5280	-	67
Canis aureus	tRNA-Tyr	5281	5348	-	68
Canis aureus	COX1	5350	6894	+	1545
Canis aureus	tRNA-Ser	6892	6960	-	69
Canis aureus	tRNA-Asp	6967	7034	+	68
Canis aureus	COX2	7035	7718	+	684
Canis aureus	tRNA-Lys	7736	7802	+	67
Canis aureus	ATP8	7804	8007	+	204
Canis aureus	ATP6	7965	8645	+	681
Canis aureus	COX3	8645	9429	+	785
Canis aureus	tRNA-Gly	9429	9496	+	68
Canis aureus	ND3	9497	9853	+	357
Canis aureus	tRNA-Arg	9844	9912	+	69
Canis aureus	ND4L	9913	10209	+	297
Canis aureus	ND4	10203	11580	+	1378
Canis aureus	tRNA-His	11581	11649	+	69
Canis aureus	tRNA-Ser	11650	11709	+	60
Canis aureus	tRNA-Leu	11710	11779	+	70
Canis aureus	ND5	11780	13600	+	1821
Canis aureus	ND6	13584	14111	-	528
Canis aureus	tRNA-Glu	14112	14180	-	69
Canis aureus	CYTB	14185	15324	+	1140
Canis aureus	tRNA-Thr	15325	15394	+	70
Canis aureus	tRNA-Pro	15394	15459	-	66
Canis aureus	putative control region	15460	16609	+	1150
Canis latrans	tRNA-Phe	1	69	+	69
Canis latrans	12S ribosomal RNA	70	1025	+	956
Canis latrans	tRNA-Val	1026	1092	+	67
Canis latrans	16S ribosomal RNA	1091	2670	+	1580
Canis latrans	tRNA-Leu	2672	2746	+	75
Canis latrans	ND1	2749	3705	+	957
Canis latrans	tRNA-Ile	3705	3773	+	69
Canis latrans	tRNA-Gln	3771	3844	-	74
Canis latrans	tRNA-Met	3846	3915	+	70
Canis latrans	ND2	3916	4959	+	1044
Canis latrans	tRNA-Trp	4958	5025	+	68
Canis latrans	tRNA-Ala	5039	5107	-	69
Canis latrans	tRNA-Asn	5109	5180	-	72
Canis latrans	tRNA-Cys	5215	5281	-	67
Canis latrans	tRNA-Tyr	5282	5349	-	68
Canis latrans	COX1	5351	6895	+	1545
Canis latrans	tRNA-Ser	6893	6961	-	69
Canis latrans	tRNA-Asp	6968	7035	+	68
Canis latrans	COX2	7036	7719	+	684
Canis latrans	tRNA-Lys	7737	7803	+	67
Canis latrans	ATP8	7805	8008	+	204
Canis latrans	ATP6	7966	8646	+	681
Canis latrans	COX3	8646	9430	+	785
Canis latrans	tRNA-Gly	9430	9497	+	68
Canis latrans	ND3	9498	9854	+	357
Canis latrans	tRNA-Arg	9845	9913	+	69
Canis latrans	ND4L	9914	10210	+	297
Canis latrans	ND4	10204	11586	+	1383
Canis latrans	tRNA-His	11582	11650	+	69
Canis latrans	tRNA-Ser	11651	11710	+	60
Canis latrans	tRNA-Leu	11711	11780	+	70
Canis latrans	ND5	11781	13601	+	1821
Canis latrans	ND6	13585	14112	-	528
Canis latrans	tRNA-Glu	14113	14181	-	69
Canis latrans	CYTB	14186	15325	+	1140
Canis latrans	tRNA-Thr	15326	15395	+	70
Canis latrans	tRNA-Pro	15395	15460	-	66
Canis latrans	putative control region	15461	16735	+	1275
Canis lupaster	tRNA-Phe	1	69	+	69
Canis lupaster	12S ribosomal RNA	70	1023	+	954
Canis lupaster	tRNA-Val	1024	1090	+	67
Canis lupaster	16S ribosomal RNA	1089	2668	+	1580
Canis lupaster	tRNA-Leu	2671	2745	+	75
Canis lupaster	ND1	2748	3704	+	957
Canis lupaster	tRNA-Ile	3704	3772	+	69
Canis lupaster	tRNA-Gln	3770	3843	-	74
Canis lupaster	tRNA-Met	3845	3914	+	70
Canis lupaster	ND2	3915	4958	+	1044
Canis lupaster	tRNA-Trp	4957	5024	+	68
Canis lupaster	tRNA-Ala	5038	5106	-	69
Canis lupaster	tRNA-Asn	5108	5179	-	72
Canis lupaster	tRNA-Cys	5214	5280	-	67
Canis lupaster	tRNA-Tyr	5281	5348	-	68
Canis lupaster	COX1	5350	6894	+	1545
Canis lupaster	tRNA-Ser	6892	6960	-	69
Canis lupaster	tRNA-Asp	6967	7034	+	68
Canis lupaster	COX2	7035	7718	+	684
Canis lupaster	tRNA-Lys	7736	7802	+	67
Canis lupaster	ATP8	7804	8007	+	204
Canis lupaster	ATP6	7965	8645	+	681
Canis lupaster	COX3	8645	9429	+	785
Canis lupaster	tRNA-Gly	9429	9496	+	68
Canis lupaster	ND3	9497	9853	+	357
Canis lupaster	tRNA-Arg	9844	9913	+	70
Canis lupaster	ND4L	9914	10210	+	297
Canis lupaster	ND4	10204	11581	+	1378
Canis lupaster	tRNA-His	11582	11650	+	69
Canis lupaster	tRNA-Ser	11651	11710	+	60
Canis lupaster	tRNA-Leu	11711	11780	+	70
Canis lupaster	ND5	11781	13601	+	1821
Canis lupaster	ND6	13585	14112	-	528
Canis lupaster	tRNA-Glu	14113	14181	-	69
Canis lupaster	CYTB	14186	15325	+	1140
Canis lupaster	tRNA-Thr	15326	15395	+	70
Canis lupaster	tRNA-Pro	15395	15460	-	66
Canis lupaster	putative control region	15461	16763	+	1303
Canis lupus familiaris	tRNA-Phe	1	69	+	69
Canis lupus familiaris	12S ribosomal RNA	70	1023	+	954
Canis lupus familiaris	tRNA-Val	1024	1090	+	67
Canis lupus familiaris	16S ribosomal RNA	1089	2668	+	1580
Canis lupus familiaris	tRNA-Leu	2671	2745	+	75
Canis lupus familiaris	ND1	2748	3704	+	957
Canis lupus familiaris	tRNA-Ile	3704	3772	+	69
Canis lupus familiaris	tRNA-Gln	3770	3843	-	74
Canis lupus familiaris	tRNA-Met	3845	3914	+	70
Canis lupus familiaris	ND2	3915	4958	+	1044
Canis lupus familiaris	tRNA-Trp	4957	5024	+	68
Canis lupus familiaris	tRNA-Ala	5038	5106	-	69
Canis lupus familiaris	tRNA-Asn	5108	5179	-	72
Canis lupus familiaris	tRNA-Cys	5214	5280	-	67
Canis lupus familiaris	tRNA-Tyr	5281	5348	-	68
Canis lupus familiaris	COX1	5350	6894	+	1545
Canis lupus familiaris	tRNA-Ser	6892	6960	-	69
Canis lupus familiaris	tRNA-Asp	6967	7034	+	68
Canis lupus familiaris	COX2	7035	7718	+	684
Canis lupus familiaris	tRNA-Lys	7736	7802	+	67
Canis lupus familiaris	ATP8	7804	8007	+	204
Canis lupus familiaris	ATP6	7965	8645	+	681
Canis lupus familiaris	COX3	8645	9429	+	785
Canis lupus familiaris	tRNA-Gly	9429	9496	+	68
Canis lupus familiaris	ND3	9497	9853	+	357
Canis lupus familiaris	tRNA-Arg	9844	9913	+	70
Canis lupus familiaris	ND4L	9914	10210	+	297
Canis lupus familiaris	ND4	10204	11581	+	1378
Canis lupus familiaris	tRNA-His	11582	11650	+	69
Canis lupus familiaris	tRNA-Ser	11651	11710	+	60
Canis lupus familiaris	tRNA-Leu	11711	11780	+	70
Canis lupus familiaris	ND5	11781	13601	+	1821
Canis lupus familiaris	ND6	13585	14109	-	525
Canis lupus familiaris	tRNA-Glu	14113	14181	-	69
Canis lupus familiaris	CYTB	14186	15325	+	1140
Canis lupus familiaris	tRNA-Thr	15326	15395	+	70
Canis lupus familiaris	tRNA-Pro	15395	15460	-	66
Canis lupus familiaris	putative control region	15461	16710	+	1250
Canis lupus lupus	tRNA-Phe	1	69	+	69
Canis lupus lupus	12S ribosomal RNA	70	1023	+	954
Canis lupus lupus	tRNA-Val	1024	1090	+	67
Canis lupus lupus	16S ribosomal RNA	1089	2668	+	1580
Canis lupus lupus	tRNA-Leu	2671	2745	+	75
Canis lupus lupus	ND1	2748	3704	+	957
Canis lupus lupus	tRNA-Ile	3704	3772	+	69
Canis lupus lupus	tRNA-Gln	3770	3843	-	74
Canis lupus lupus	tRNA-Met	3845	3914	+	70
Canis lupus lupus	ND2	3915	4958	+	1044
Canis lupus lupus	tRNA-Trp	4957	5024	+	68
Canis lupus lupus	tRNA-Ala	5038	5106	-	69
Canis lupus lupus	tRNA-Asn	5108	5179	-	72
Canis lupus lupus	tRNA-Cys	5214	5280	-	67
Canis lupus lupus	tRNA-Tyr	5281	5347	-	67
Canis lupus lupus	COX1	5349	6893	+	1545
Canis lupus lupus	tRNA-Ser	6891	6959	-	69
Canis lupus lupus	tRNA-Asp	6966	7033	+	68
Canis lupus lupus	COX2	7034	7717	+	684
Canis lupus lupus	tRNA-Lys	7735	7801	+	67
Canis lupus lupus	ATP8	7803	8006	+	204
Canis lupus lupus	ATP6	7964	8644	+	681
Canis lupus lupus	COX3	8644	9428	+	785
Canis lupus lupus	tRNA-Gly	9428	9495	+	68
Canis lupus lupus	ND3	9496	9852	+	357
Canis lupus lupus	tRNA-Arg	9843	9912	+	70
Canis lupus lupus	ND4L	9913	10209	+	297
Canis lupus lupus	ND4	10203	11580	+	1378
Canis lupus lupus	tRNA-His	11581	11649	+	69
Canis lupus lupus	tRNA-Ser	11650	11709	+	60
Canis lupus lupus	tRNA-Leu	11710	11779	+	70
Canis lupus lupus	ND5	11780	13600	+	1821
Canis lupus lupus	ND6	13584	14108	-	525
Canis lupus lupus	tRNA-Glu	14112	14180	-	69
Canis lupus lupus	CYTB	14185	15324	+	1140
Canis lupus lupus	tRNA-Thr	15325	15394	+	70
Canis lupus lupus	tRNA-Pro	15394	15459	-	66
Canis lupus lupus	putative control region	15460	16730	+	1271
Canis lycaon	tRNA-Phe	1	69	+	69
Canis lycaon	12S ribosomal RNA	70	1024	+	955
Canis lycaon	tRNA-Val	1025	1091	+	67
Canis lycaon	16S ribosomal RNA	1090	2669	+	1580
Canis lycaon	tRNA-Leu	2671	2745	+	75
Canis lycaon	ND1	2748	3704	+	957
Canis lycaon	tRNA-Ile	3704	3772	+	69
Canis lycaon	tRNA-Gln	3770	3843	-	74
Canis lycaon	tRNA-Met	3845	3914	+	70
Canis lycaon	ND2	3915	4958	+	1044
Canis lycaon	tRNA-Trp	4957	5024	+	68
Canis lycaon	tRNA-Ala	5038	5106	-	69
Canis lycaon	tRNA-Asn	5108	5179	-	72
Canis lycaon	tRNA-Cys	5214	5280	-	67
Canis lycaon	tRNA-Tyr	5281	5348	-	68
Canis lycaon	COX1	5350	6894	+	1545
Canis lycaon	tRNA-Ser	6892	6960	-	69
Canis lycaon	tRNA-Asp	6967	7034	+	68
Canis lycaon	COX2	7035	7718	+	684
Canis lycaon	tRNA-Lys	7736	7802	+	67
Canis lycaon	ATP8	7804	8007	+	204
Canis lycaon	ATP6	7965	8645	+	681
Canis lycaon	COX3	8645	9429	+	785
Canis lycaon	tRNA-Gly	9429	9496	+	68
Canis lycaon	ND3	9497	9853	+	357
Canis lycaon	tRNA-Arg	9844	9912	+	69
Canis lycaon	ND4L	9913	10209	+	297
Canis lycaon	ND4	10203	11585	+	1383
Canis lycaon	tRNA-His	11581	11649	+	69
Canis lycaon	tRNA-Ser	11650	11709	+	60
Canis lycaon	tRNA-Leu	11710	11779	+	70
Canis lycaon	ND5	11780	13600	+	1821
Canis lycaon	ND6	13584	14111	-	528
Canis lycaon	tRNA-Glu	14112	14180	-	69
Canis lycaon	CYTB	14185	15324	+	1140
Canis lycaon	tRNA-Thr	15325	15394	+	70
Canis lycaon	tRNA-Pro	15394	15459	-	66
Canis lycaon	putative control region	15460	16524	+	1065
Canis rufus	tRNA-Phe	1	69	+	69
Canis rufus	12S ribosomal RNA	70	1024	+	955
Canis rufus	tRNA-Val	1025	1091	+	67
Canis rufus	16S ribosomal RNA	1090	2669	+	1580
Canis rufus	tRNA-Leu	2671	2745	+	75
Canis rufus	ND1	2748	3704	+	957
Canis rufus	tRNA-Ile	3704	3772	+	69
Canis rufus	tRNA-Gln	3770	3843	-	74
Canis rufus	tRNA-Met	3845	3914	+	70
Canis rufus	ND2	3915	4958	+	1044
Canis rufus	tRNA-Trp	4957	5024	+	68
Canis rufus	tRNA-Ala	5038	5106	-	69
Canis rufus	tRNA-Asn	5108	5179	-	72
Canis rufus	tRNA-Cys	5214	5280	-	67
Canis rufus	tRNA-Tyr	5281	5348	-	68
Canis rufus	COX1	5350	6894	+	1545
Canis rufus	tRNA-Ser	6892	6960	-	69
Canis rufus	tRNA-Asp	6967	7034	+	68
Canis rufus	COX2	7035	7718	+	684
Canis rufus	tRNA-Lys	7736	7802	+	67
Canis rufus	ATP8	7804	8007	+	204
Canis rufus	ATP6	7965	8645	+	681
Canis rufus	COX3	8645	9429	+	785
Canis rufus	tRNA-Gly	9429	9496	+	68
Canis rufus	ND3	9497	9853	+	357
Canis rufus	tRNA-Arg	9844	9912	+	69
Canis rufus	ND4L	9913	10209	+	297
Canis rufus	ND4	10203	11585	+	1383
Canis rufus	tRNA-His	11581	11649	+	69
Canis rufus	tRNA-Ser	11650	11709	+	60
Canis rufus	tRNA-Leu	11710	11779	+	70
Canis rufus	ND5	11780	13600	+	1821
Canis rufus	ND6	13584	14111	-	528
Canis rufus	tRNA-Glu	14112	14180	-	69
Canis rufus	CYTB	14185	15324	+	1140
Canis rufus	tRNA-Thr	15325	15394	+	70
Canis rufus	tRNA-Pro	15394	15459	-	66
Canis rufus	putative control region	15460	16724	+	1265
Canis simensis	tRNA-Phe	1	69	+	69
Canis simensis	12S ribosomal RNA	70	1023	+	954
Canis simensis	tRNA-Val	1024	1090	+	67
Canis simensis	16S ribosomal RNA	1089	2668	+	1580
Canis simensis	tRNA-Leu	2671	2745	+	75
Canis simensis	ND1	2748	3704	+	957
Canis simensis	tRNA-Ile	3704	3772	+	69
Canis simensis	tRNA-Gln	3770	3843	-	74
Canis simensis	tRNA-Met	3845	3914	+	70
Canis simensis	ND2	3915	4958	+	1044
Canis simensis	tRNA-Trp	4957	5024	+	68
Canis simensis	tRNA-Ala	5038	5106	-	69
Canis simensis	tRNA-Asn	5108	5179	-	72
Canis simensis	tRNA-Cys	5214	5280	-	67
Canis simensis	tRNA-Tyr	5281	5348	-	68
Canis simensis	COX1	5350	6894	+	1545
Canis simensis	tRNA-Ser	6892	6960	-	69
Canis simensis	tRNA-Asp	6967	7034	+	68
Canis simensis	COX2	7035	7718	+	684
Canis simensis	tRNA-Lys	7736	7802	+	67
Canis simensis	ATP8	7804	8007	+	204
Canis simensis	ATP6	7965	8645	+	681
Canis simensis	COX3	8645	9429	+	785
Canis simensis	tRNA-Gly	9429	9496	+	68
Canis simensis	ND3	9497	9853	+	357
Canis simensis	tRNA-Arg	9844	9912	+	69
Canis simensis	ND4L	9913	10209	+	297
Canis simensis	ND4	10203	11580	+	1378
Canis simensis	tRNA-His	11581	11649	+	69
Canis simensis	tRNA-Ser	11650	11709	+	60
Canis simensis	tRNA-Leu	11710	11779	+	70
Canis simensis	ND5	11780	13600	+	1821
Canis simensis	ND6	13584	14108	-	525
Canis simensis	tRNA-Glu	14112	14180	-	69
Canis simensis	CYTB	14185	15324	+	1140
Canis simensis	tRNA-Thr	15325	15394	+	70
Canis simensis	tRNA-Pro	15394	15459	-	66
Canis simensis	putative control region	15460	16716	+	1257
Chrysocyon brachyurus	tRNA-Phe	1	69	+	69
Chrysocyon brachyurus	12S ribosomal RNA	70	1026	+	957
Chrysocyon brachyurus	tRNA-Val	1027	1093	+	67
Chrysocyon brachyurus	16S ribosomal RNA	1092	2671	+	1580
Chrysocyon brachyurus	tRNA-Leu	2674	2748	+	75
Chrysocyon brachyurus	ND1	2751	3707	+	957
Chrysocyon brachyurus	tRNA-Ile	3707	3775	+	69
Chrysocyon brachyurus	tRNA-Gln	3773	3846	-	74
Chrysocyon brachyurus	tRNA-Met	3848	3917	+	70
Chrysocyon brachyurus	ND2	3918	4961	+	1044
Chrysocyon brachyurus	tRNA-Trp	4960	5027	+	68
Chrysocyon brachyurus	tRNA-Ala	5041	5109	-	69
Chrysocyon brachyurus	tRNA-Asn	5110	5181	-	72
Chrysocyon brachyurus	tRNA-Cys	5216	5283	-	68
Chrysocyon brachyurus	tRNA-Tyr	5284	5351	-	68
Chrysocyon brachyurus	COX1	5353	6897	+	1545
Chrysocyon brachyurus	tRNA-Ser	6895	6963	-	69
Chrysocyon brachyurus	tRNA-Asp	6970	7037	+	68
Chrysocyon brachyurus	COX2	7038	7721	+	684
Chrysocyon brachyurus	tRNA-Lys	7739	7805	+	67
Chrysocyon brachyurus	ATP8	7807	8010	+	204
Chrysocyon brachyurus	ATP6	7968	8648	+	681
Chrysocyon brachyurus	COX3	8648	9432	+	785
Chrysocyon brachyurus	tRNA-Gly	9432	9499	+	68
Chrysocyon brachyurus	ND3	9500	9856	+	357
Chrysocyon brachyurus	tRNA-Arg	9847	9916	+	70
Chrysocyon brachyurus	ND4L	9917	10213	+	297
Chrysocyon brachyurus	ND4	10207	11582	+	1376
Chrysocyon brachyurus	tRNA-His	11585	11653	+	69
Chrysocyon brachyurus	tRNA-Ser	11654	11713	+	60
Chrysocyon brachyurus	tRNA-Leu	11714	11783	+	70
Chrysocyon brachyurus	ND5	11784	13604	+	1821
Chrysocyon brachyurus	ND6	13588	14115	-	528
Chrysocyon brachyurus	tRNA-Glu	14116	14184	-	69
Chrysocyon brachyurus	CYTB	14189	15328	+	1140
Chrysocyon brachyurus	tRNA-Thr	15329	15398	+	70
Chrysocyon brachyurus	tRNA-Pro	15398	15463	-	66
Chrysocyon brachyurus	putative control region	15464	16581	+	1118
Cuon alpinus	tRNA-Phe	1	69	+	69
Cuon alpinus	12S ribosomal RNA	70	1024	+	955
Cuon alpinus	tRNA-Val	1025	1091	+	67
Cuon alpinus	16S ribosomal RNA	1090	2671	+	1582
Cuon alpinus	tRNA-Leu	2673	2747	+	75
Cuon alpinus	ND1	2751	3707	+	957
Cuon alpinus	tRNA-Ile	3707	3775	+	69
Cuon alpinus	tRNA-Gln	3773	3846	-	74
Cuon alpinus	tRNA-Met	3848	3917	+	70
Cuon alpinus	ND2	3918	4961	+	1044
Cuon alpinus	tRNA-Trp	4960	5027	+	68
Cuon alpinus	tRNA-Ala	5041	5109	-	69
Cuon alpinus	tRNA-Asn	5111	5182	-	72
Cuon alpinus	tRNA-Cys	5217	5282	-	66
Cuon alpinus	tRNA-Tyr	5283	5349	-	67
Cuon alpinus	COX1	5351	6895	+	1545
Cuon alpinus	tRNA-Ser	6893	6961	-	69
Cuon alpinus	tRNA-Asp	6968	7035	+	68
Cuon alpinus	COX2	7036	7719	+	684
Cuon alpinus	tRNA-Lys	7737	7803	+	67
Cuon alpinus	ATP8	7805	8008	+	204
Cuon alpinus	ATP6	7966	8646	+	681
Cuon alpinus	COX3	8646	9430	+	785
Cuon alpinus	tRNA-Gly	9430	9497	+	68
Cuon alpinus	ND3	9498	9854	+	357
Cuon alpinus	tRNA-Arg	9845	9915	+	71
Cuon alpinus	ND4L	9916	10212	+	297
Cuon alpinus	ND4	10206	11583	+	1378
Cuon alpinus	tRNA-His	11584	11652	+	69
Cuon alpinus	tRNA-Ser	11653	11712	+	60
Cuon alpinus	tRNA-Leu	11713	11782	+	70
Cuon alpinus	ND5	11783	13603	+	1821
Cuon alpinus	ND6	13587	14114	-	528
Cuon alpinus	tRNA-Glu	14115	14183	-	69
Cuon alpinus	CYTB	14188	15327	+	1140
Cuon alpinus	tRNA-Thr	15328	15397	+	70
Cuon alpinus	tRNA-Pro	15397	15462	-	66
Cuon alpinus	putative control region	15463	16708	+	1246
Lupullela adusta	tRNA-Phe	1	69	+	69
Lupullela adusta	12S ribosomal RNA	70	1024	+	955
Lupullela adusta	tRNA-Val	1025	1091	+	67
Lupullela adusta	16S ribosomal RNA	1090	2672	+	1583
Lupullela adusta	tRNA-Leu	2674	2748	+	75
Lupullela adusta	ND1	2751	3707	+	957
Lupullela adusta	tRNA-Ile	3707	3775	+	69
Lupullela adusta	tRNA-Gln	3773	3846	-	74
Lupullela adusta	tRNA-Met	3848	3917	+	70
Lupullela adusta	ND2	3918	4961	+	1044
Lupullela adusta	tRNA-Trp	4960	5027	+	68
Lupullela adusta	tRNA-Ala	5041	5109	-	69
Lupullela adusta	tRNA-Asn	5111	5182	-	72
Lupullela adusta	tRNA-Cys	5217	5283	-	67
Lupullela adusta	tRNA-Tyr	5284	5351	-	68
Lupullela adusta	COX1	5353	6897	+	1545
Lupullela adusta	tRNA-Ser	6895	6963	-	69
Lupullela adusta	tRNA-Asp	6970	7037	+	68
Lupullela adusta	COX2	7038	7721	+	684
Lupullela adusta	tRNA-Lys	7739	7805	+	67
Lupullela adusta	ATP8	7807	8010	+	204
Lupullela adusta	ATP6	7968	8648	+	681
Lupullela adusta	COX3	8648	9432	+	785
Lupullela adusta	tRNA-Gly	9432	9500	+	69
Lupullela adusta	ND3	9501	9857	+	357
Lupullela adusta	tRNA-Arg	9848	9916	+	69
Lupullela adusta	ND4L	9917	10213	+	297
Lupullela adusta	ND4	10207	11584	+	1378
Lupullela adusta	tRNA-His	11585	11653	+	69
Lupullela adusta	tRNA-Ser	11654	11714	+	61
Lupullela adusta	tRNA-Leu	11715	11784	+	70
Lupullela adusta	ND5	11785	13605	+	1821
Lupullela adusta	ND6	13589	14116	-	528
Lupullela adusta	tRNA-Glu	14117	14185	-	69
Lupullela adusta	CYTB	14190	15329	+	1140
Lupullela adusta	tRNA-Thr	15330	15398	+	69
Lupullela adusta	tRNA-Pro	15398	15463	-	66
Lupullela adusta	putative control region	15464	16658	+	1195
Lupullela mesomelas	tRNA-Phe	1	69	+	69
Lupullela mesomelas	12S ribosomal RNA	70	1024	+	955
Lupullela mesomelas	tRNA-Val	1025	1091	+	67
Lupullela mesomelas	16S ribosomal RNA	1090	2673	+	1584
Lupullela mesomelas	tRNA-Leu	2675	2749	+	75
Lupullela mesomelas	ND1	2752	3708	+	957
Lupullela mesomelas	tRNA-Ile	3708	3776	+	69
Lupullela mesomelas	tRNA-Gln	3774	3847	-	74
Lupullela mesomelas	tRNA-Met	3849	3918	+	70
Lupullela mesomelas	ND2	3919	4962	+	1044
Lupullela mesomelas	tRNA-Trp	4961	5028	+	68
Lupullela mesomelas	tRNA-Ala	5042	5110	-	69
Lupullela mesomelas	tRNA-Asn	5112	5183	-	72
Lupullela mesomelas	tRNA-Cys	5218	5284	-	67
Lupullela mesomelas	tRNA-Tyr	5285	5352	-	68
Lupullela mesomelas	COX1	5354	6898	+	1545
Lupullela mesomelas	tRNA-Ser	6896	6964	-	69
Lupullela mesomelas	tRNA-Asp	6971	7038	+	68
Lupullela mesomelas	COX2	7039	7722	+	684
Lupullela mesomelas	tRNA-Lys	7740	7806	+	67
Lupullela mesomelas	ATP8	7808	8011	+	204
Lupullela mesomelas	ATP6	7969	8649	+	681
Lupullela mesomelas	COX3	8649	9433	+	785
Lupullela mesomelas	tRNA-Gly	9433	9500	+	68
Lupullela mesomelas	ND3	9501	9857	+	357
Lupullela mesomelas	tRNA-Arg	9848	9916	+	69
Lupullela mesomelas	ND4L	9917	10213	+	297
Lupullela mesomelas	ND4	10207	11584	+	1378
Lupullela mesomelas	tRNA-His	11585	11653	+	69
Lupullela mesomelas	tRNA-Ser	11654	11713	+	60
Lupullela mesomelas	tRNA-Leu	11714	11783	+	70
Lupullela mesomelas	ND5	11784	13604	+	1821
Lupullela mesomelas	ND6	13588	14115	-	528
Lupullela mesomelas	tRNA-Glu	14116	14184	-	69
Lupullela mesomelas	CYTB	14189	15328	+	1140
Lupullela mesomelas	tRNA-Thr	15329	15398	+	70
Lupullela mesomelas	tRNA-Pro	15398	15463	-	66
Lupullela mesomelas	putative control region	15464	16702	+	1239
Lycalopex culpaeus	tRNA-Phe	1	69	+	69
Lycalopex culpaeus	12S ribosomal RNA	70	1026	+	957
Lycalopex culpaeus	tRNA-Val	1027	1093	+	67
Lycalopex culpaeus	16S ribosomal RNA	1092	2669	+	1578
Lycalopex culpaeus	tRNA-Leu	2671	2745	+	75
Lycalopex culpaeus	ND1	2748	3704	+	957
Lycalopex culpaeus	tRNA-Ile	3704	3772	+	69
Lycalopex culpaeus	tRNA-Gln	3770	3843	-	74
Lycalopex culpaeus	tRNA-Met	3845	3914	+	70
Lycalopex culpaeus	ND2	3915	4958	+	1044
Lycalopex culpaeus	tRNA-Trp	4957	5024	+	68
Lycalopex culpaeus	tRNA-Ala	5038	5106	-	69
Lycalopex culpaeus	tRNA-Asn	5108	5179	-	72
Lycalopex culpaeus	tRNA-Cys	5214	5281	-	68
Lycalopex culpaeus	tRNA-Tyr	5282	5348	-	67
Lycalopex culpaeus	COX1	5350	6894	+	1545
Lycalopex culpaeus	tRNA-Ser	6892	6960	-	69
Lycalopex culpaeus	tRNA-Asp	6967	7034	+	68
Lycalopex culpaeus	COX2	7035	7718	+	684
Lycalopex culpaeus	tRNA-Lys	7736	7802	+	67
Lycalopex culpaeus	ATP8	7804	8007	+	204
Lycalopex culpaeus	ATP6	7965	8645	+	681
Lycalopex culpaeus	COX3	8645	9429	+	785
Lycalopex culpaeus	tRNA-Gly	9429	9496	+	68
Lycalopex culpaeus	ND3	9497	9853	+	357
Lycalopex culpaeus	tRNA-Arg	9844	9912	+	69
Lycalopex culpaeus	ND4L	9913	10209	+	297
Lycalopex culpaeus	ND4	10203	11580	+	1378
Lycalopex culpaeus	tRNA-His	11581	11649	+	69
Lycalopex culpaeus	tRNA-Ser	11650	11709	+	60
Lycalopex culpaeus	tRNA-Leu	11710	11779	+	70
Lycalopex culpaeus	ND5	11780	13609	+	1830
Lycalopex culpaeus	ND6	13584	14108	-	525
Lycalopex culpaeus	tRNA-Glu	14112	14180	-	69
Lycalopex culpaeus	CYTB	14185	15324	+	1140
Lycalopex culpaeus	tRNA-Thr	15325	15393	+	69
Lycalopex culpaeus	tRNA-Pro	15393	15458	-	66
Lycalopex culpaeus	putative control region	15459	16675	+	1217
Lycalopex fulvipes	tRNA-Phe	1	69	+	69
Lycalopex fulvipes	12S ribosomal RNA	70	1025	+	956
Lycalopex fulvipes	tRNA-Val	1026	1092	+	67
Lycalopex fulvipes	16S ribosomal RNA	1091	2668	+	1578
Lycalopex fulvipes	tRNA-Leu	2670	2744	+	75
Lycalopex fulvipes	ND1	2747	3703	+	957
Lycalopex fulvipes	tRNA-Ile	3703	3771	+	69
Lycalopex fulvipes	tRNA-Gln	3769	3842	-	74
Lycalopex fulvipes	tRNA-Met	3844	3913	+	70
Lycalopex fulvipes	ND2	3914	4957	+	1044
Lycalopex fulvipes	tRNA-Trp	4956	5023	+	68
Lycalopex fulvipes	tRNA-Ala	5037	5105	-	69
Lycalopex fulvipes	tRNA-Asn	5107	5178	-	72
Lycalopex fulvipes	tRNA-Cys	5213	5280	-	68
Lycalopex fulvipes	tRNA-Tyr	5281	5347	-	67
Lycalopex fulvipes	COX1	5349	6893	+	1545
Lycalopex fulvipes	tRNA-Ser	6891	6959	-	69
Lycalopex fulvipes	tRNA-Asp	6966	7033	+	68
Lycalopex fulvipes	COX2	7034	7717	+	684
Lycalopex fulvipes	tRNA-Lys	7735	7801	+	67
Lycalopex fulvipes	ATP8	7803	8006	+	204
Lycalopex fulvipes	ATP6	7964	8644	+	681
Lycalopex fulvipes	COX3	8644	9428	+	785
Lycalopex fulvipes	tRNA-Gly	9428	9495	+	68
Lycalopex fulvipes	ND3	9496	9852	+	357
Lycalopex fulvipes	tRNA-Arg	9843	9911	+	69
Lycalopex fulvipes	ND4L	9912	10208	+	297
Lycalopex fulvipes	ND4	10202	11579	+	1378
Lycalopex fulvipes	tRNA-His	11580	11648	+	69
Lycalopex fulvipes	tRNA-Ser	11649	11708	+	60
Lycalopex fulvipes	tRNA-Leu	11709	11778	+	70
Lycalopex fulvipes	ND5	11779	13599	+	1821
Lycalopex fulvipes	ND6	13583	14107	-	525
Lycalopex fulvipes	tRNA-Glu	14111	14179	-	69
Lycalopex fulvipes	CYTB	14184	15323	+	1140
Lycalopex fulvipes	tRNA-Thr	15324	15392	+	69
Lycalopex fulvipes	tRNA-Pro	15392	15457	-	66
Lycalopex fulvipes	putative control region	15458	16594	+	1137
Lycalopex griseus	tRNA-Phe	1	69	+	69
Lycalopex griseus	12S ribosomal RNA	70	1026	+	957
Lycalopex griseus	tRNA-Val	1027	1093	+	67
Lycalopex griseus	16S ribosomal RNA	1092	2669	+	1578
Lycalopex griseus	tRNA-Leu	2671	2745	+	75
Lycalopex griseus	ND1	2748	3704	+	957
Lycalopex griseus	tRNA-Ile	3704	3772	+	69
Lycalopex griseus	tRNA-Gln	3770	3843	-	74
Lycalopex griseus	tRNA-Met	3845	3914	+	70
Lycalopex griseus	ND2	3915	4958	+	1044
Lycalopex griseus	tRNA-Trp	4957	5024	+	68
Lycalopex griseus	tRNA-Ala	5038	5106	-	69
Lycalopex griseus	tRNA-Asn	5108	5179	-	72
Lycalopex griseus	tRNA-Cys	5214	5281	-	68
Lycalopex griseus	tRNA-Tyr	5282	5348	-	67
Lycalopex griseus	COX1	5350	6894	+	1545
Lycalopex griseus	tRNA-Ser	6892	6960	-	69
Lycalopex griseus	tRNA-Asp	6967	7034	+	68
Lycalopex griseus	COX2	7035	7718	+	684
Lycalopex griseus	tRNA-Lys	7736	7802	+	67
Lycalopex griseus	ATP8	7804	8007	+	204
Lycalopex griseus	ATP6	7965	8645	+	681
Lycalopex griseus	COX3	8645	9429	+	785
Lycalopex griseus	tRNA-Gly	9429	9496	+	68
Lycalopex griseus	ND3	9497	9853	+	357
Lycalopex griseus	tRNA-Arg	9844	9912	+	69
Lycalopex griseus	ND4L	9913	10209	+	297
Lycalopex griseus	ND4	10203	11580	+	1378
Lycalopex griseus	tRNA-His	11581	11649	+	69
Lycalopex griseus	tRNA-Ser	11650	11709	+	60
Lycalopex griseus	tRNA-Leu	11710	11779	+	70
Lycalopex griseus	ND5	11780	13600	+	1821
Lycalopex griseus	ND6	13584	14108	-	525
Lycalopex griseus	tRNA-Glu	14112	14180	-	69
Lycalopex griseus	CYTB	14185	15324	+	1140
Lycalopex griseus	tRNA-Thr	15325	15393	+	69
Lycalopex griseus	tRNA-Pro	15393	15458	-	66
Lycalopex griseus	putative control region	15459	16715	+	1257
Lycalopex gymnocercus	tRNA-Phe	1	69	+	69
Lycalopex gymnocercus	12S ribosomal RNA	70	1026	+	957
Lycalopex gymnocercus	tRNA-Val	1027	1093	+	67
Lycalopex gymnocercus	16S ribosomal RNA	1092	2669	+	1578
Lycalopex gymnocercus	tRNA-Leu	2671	2745	+	75
Lycalopex gymnocercus	ND1	2748	3704	+	957
Lycalopex gymnocercus	tRNA-Ile	3704	3772	+	69
Lycalopex gymnocercus	tRNA-Gln	3770	3843	-	74
Lycalopex gymnocercus	tRNA-Met	3845	3914	+	70
Lycalopex gymnocercus	ND2	3915	4958	+	1044
Lycalopex gymnocercus	tRNA-Trp	4957	5024	+	68
Lycalopex gymnocercus	tRNA-Ala	5038	5106	-	69
Lycalopex gymnocercus	tRNA-Asn	5108	5179	-	72
Lycalopex gymnocercus	tRNA-Cys	5214	5281	-	68
Lycalopex gymnocercus	tRNA-Tyr	5282	5348	-	67
Lycalopex gymnocercus	COX1	5350	6894	+	1545
Lycalopex gymnocercus	tRNA-Ser	6892	6960	-	69
Lycalopex gymnocercus	tRNA-Asp	6967	7034	+	68
Lycalopex gymnocercus	COX2	7035	7718	+	684
Lycalopex gymnocercus	tRNA-Lys	7736	7802	+	67
Lycalopex gymnocercus	ATP8	7804	8007	+	204
Lycalopex gymnocercus	ATP6	7965	8645	+	681
Lycalopex gymnocercus	COX3	8645	9429	+	785
Lycalopex gymnocercus	tRNA-Gly	9429	9496	+	68
Lycalopex gymnocercus	ND3	9497	9853	+	357
Lycalopex gymnocercus	tRNA-Arg	9844	9911	+	68
Lycalopex gymnocercus	ND4L	9912	10208	+	297
Lycalopex gymnocercus	ND4	10202	11579	+	1378
Lycalopex gymnocercus	tRNA-His	11580	11648	+	69
Lycalopex gymnocercus	tRNA-Ser	11649	11708	+	60
Lycalopex gymnocercus	tRNA-Leu	11709	11778	+	70
Lycalopex gymnocercus	ND5	11779	13599	+	1821
Lycalopex gymnocercus	ND6	13583	14107	-	525
Lycalopex gymnocercus	tRNA-Glu	14111	14179	-	69
Lycalopex gymnocercus	CYTB	14184	15323	+	1140
Lycalopex gymnocercus	tRNA-Thr	15324	15392	+	69
Lycalopex gymnocercus	tRNA-Pro	15392	15457	-	66
Lycalopex gymnocercus	putative control region	15458	16525	+	1068
Lycalopex sechurae	tRNA-Phe	1	69	+	69
Lycalopex sechurae	12S ribosomal RNA	70	1026	+	957
Lycalopex sechurae	tRNA-Val	1027	1093	+	67
Lycalopex sechurae	16S ribosomal RNA	1092	2670	+	1579
Lycalopex sechurae	tRNA-Leu	2672	2746	+	75
Lycalopex sechurae	ND1	2749	3705	+	957
Lycalopex sechurae	tRNA-Ile	3705	3773	+	69
Lycalopex sechurae	tRNA-Gln	3771	3844	-	74
Lycalopex sechurae	tRNA-Met	3846	3915	+	70
Lycalopex sechurae	ND2	3916	4959	+	1044
Lycalopex sechurae	tRNA-Trp	4958	5025	+	68
Lycalopex sechurae	tRNA-Ala	5039	5107	-	69
Lycalopex sechurae	tRNA-Asn	5109	5180	-	72
Lycalopex sechurae	tRNA-Cys	5215	5282	-	68
Lycalopex sechurae	tRNA-Tyr	5283	5349	-	67
Lycalopex sechurae	COX1	5351	6895	+	1545
Lycalopex sechurae	tRNA-Ser	6893	6961	-	69
Lycalopex sechurae	tRNA-Asp	6968	7035	+	68
Lycalopex sechurae	COX2	7036	7719	+	684
Lycalopex sechurae	tRNA-Lys	7737	7803	+	67
Lycalopex sechurae	ATP8	7805	8008	+	204
Lycalopex sechurae	ATP6	7966	8646	+	681
Lycalopex sechurae	COX3	8646	9430	+	785
Lycalopex sechurae	tRNA-Gly	9430	9497	+	68
Lycalopex sechurae	ND3	9498	9854	+	357
Lycalopex sechurae	tRNA-Arg	9845	9913	+	69
Lycalopex sechurae	ND4L	9914	10210	+	297
Lycalopex sechurae	ND4	10204	11581	+	1378
Lycalopex sechurae	tRNA-His	11582	11650	+	69
Lycalopex sechurae	tRNA-Ser	11651	11710	+	60
Lycalopex sechurae	tRNA-Leu	11711	11780	+	70
Lycalopex sechurae	ND5	11781	13601	+	1821
Lycalopex sechurae	ND6	13585	14112	-	528
Lycalopex sechurae	tRNA-Glu	14113	14181	-	69
Lycalopex sechurae	CYTB	14186	15325	+	1140
Lycalopex sechurae	tRNA-Thr	15326	15394	+	69
Lycalopex sechurae	tRNA-Pro	15394	15459	-	66
Lycalopex sechurae	putative control region	15460	16732	+	1273
Speothos venaticus	tRNA-Phe	1	66	+	66
Speothos venaticus	12S ribosomal RNA	67	1020	+	954
Speothos venaticus	tRNA-Val	1021	1087	+	67
Speothos venaticus	16S ribosomal RNA	1086	2663	+	1578
Speothos venaticus	tRNA-Leu	2665	2739	+	75
Speothos venaticus	ND1	2742	3698	+	957
Speothos venaticus	tRNA-Ile	3698	3766	+	69
Speothos venaticus	tRNA-Gln	3764	3837	-	74
Speothos venaticus	tRNA-Met	3839	3908	+	70
Speothos venaticus	ND2	3909	4952	+	1044
Speothos venaticus	tRNA-Trp	4951	5018	+	68
Speothos venaticus	tRNA-Ala	5033	5101	-	69
Speothos venaticus	tRNA-Asn	5103	5174	-	72
Speothos venaticus	tRNA-Cys	5209	5276	-	68
Speothos venaticus	tRNA-Tyr	5277	5344	-	68
Speothos venaticus	COX1	5346	6890	+	1545
Speothos venaticus	tRNA-Ser	6888	6956	-	69
Speothos venaticus	tRNA-Asp	6963	7030	+	68
Speothos venaticus	COX2	7031	7714	+	684
Speothos venaticus	tRNA-Lys	7732	7798	+	67
Speothos venaticus	ATP8	7800	8003	+	204
Speothos venaticus	ATP6	7961	8641	+	681
Speothos venaticus	COX3	8641	9425	+	785
Speothos venaticus	tRNA-Gly	9425	9492	+	68
Speothos venaticus	ND3	9493	9849	+	357
Speothos venaticus	tRNA-Arg	9840	9908	+	69
Speothos venaticus	ND4L	9909	10205	+	297
Speothos venaticus	ND4	10199	11576	+	1378
Speothos venaticus	tRNA-His	11577	11645	+	69
Speothos venaticus	tRNA-Ser	11646	11705	+	60
Speothos venaticus	tRNA-Leu	11706	11775	+	70
Speothos venaticus	ND5	11776	13596	+	1821
Speothos venaticus	ND6	13580	14107	-	528
Speothos venaticus	tRNA-Glu	14108	14176	-	69
Speothos venaticus	CYTB	14181	15320	+	1140
Speothos venaticus	tRNA-Thr	15321	15390	+	70
Speothos venaticus	tRNA-Pro	15390	15455	-	66
Speothos venaticus	putative control region	15456	16716	+	1261
Vulpes vulpes	tRNA-Phe	1	69	+	69
Vulpes vulpes	12S ribosomal RNA	70	1026	+	957
Vulpes vulpes	tRNA-Val	1027	1093	+	67
Vulpes vulpes	16S ribosomal RNA	1092	2669	+	1578
Vulpes vulpes	tRNA-Leu	2673	2747	+	75
Vulpes vulpes	ND1	2750	3706	+	957
Vulpes vulpes	tRNA-Ile	3706	3774	+	69
Vulpes vulpes	tRNA-Gln	3772	3845	-	74
Vulpes vulpes	tRNA-Met	3847	3916	+	70
Vulpes vulpes	ND2	3917	4960	+	1044
Vulpes vulpes	tRNA-Trp	4959	5026	+	68
Vulpes vulpes	tRNA-Ala	5039	5107	-	69
Vulpes vulpes	tRNA-Asn	5109	5179	-	71
Vulpes vulpes	tRNA-Cys	5214	5281	-	68
Vulpes vulpes	tRNA-Tyr	5282	5349	-	68
Vulpes vulpes	COX1	5351	6895	+	1545
Vulpes vulpes	tRNA-Ser	6893	6961	-	69
Vulpes vulpes	tRNA-Asp	6968	7035	+	68
Vulpes vulpes	COX2	7036	7719	+	684
Vulpes vulpes	tRNA-Lys	7737	7803	+	67
Vulpes vulpes	ATP8	7805	8008	+	204
Vulpes vulpes	ATP6	7966	8646	+	681
Vulpes vulpes	COX3	8646	9430	+	785
Vulpes vulpes	tRNA-Gly	9430	9497	+	68
Vulpes vulpes	ND3	9498	9854	+	357
Vulpes vulpes	tRNA-Arg	9845	9913	+	69
Vulpes vulpes	ND4L	9914	10210	+	297
Vulpes vulpes	ND4	10204	11586	+	1383
Vulpes vulpes	tRNA-His	11582	11650	+	69
Vulpes vulpes	tRNA-Ser	11651	11710	+	60
Vulpes vulpes	tRNA-Leu	11711	11780	+	70
Vulpes vulpes	ND5	11781	13601	+	1821
Vulpes vulpes	ND6	13585	14112	-	528
Vulpes vulpes	tRNA-Glu	14113	14181	-	69
Vulpes vulpes	CYTB	14186	15325	+	1140
Vulpes vulpes	tRNA-Thr	15326	15395	+	70
Vulpes vulpes	tRNA-Pro	15395	15460	-	66
Vulpes vulpes	putative control region	15461	16667	+	1207

## Sheet: S05 - Best-fit Models ML
Subset	Model	Partition
1	TNe + FQ + I + R3	ND6_1st, COX1_1st, COX2_1st, COX3_1st, ND1_1st
2	HKY + F + R3	ND6_2nd, ATP6_2nd, COX1_2nd, COX2_2nd, COX3_2nd, CYTB_2nd, ND1_2nd, ND3_2nd, ND4_2nd, ND4L_2nd, ND5_2nd
3	TPM2u + F + G4	ND6_3rd
4	TIM3 + F + I + G4	ATP6_1st, ATP8_2nd, CYTB_1st, ND2_2nd, ND3_1st, ND4_1st, ND4L_1st, ND5_1st
5	TN + F + I + G4	ATP6_3rd, ATP8_3rd, COX1_3rd, COX2_3rd, ND4L_3rd
6	HKY + F + I + G4	ATP8_1st, ND2_1st
7	TIM+F+I+R2	COX3_3rd, CYTB_3rd, ND1_3rd, ND3_3rd, ND4_3rd, ND5_3rd
8	GTR+F+I+G4	ND2_3rd

## Sheet: S06 - Best-fit Models BI
Subset	Model	Partition
1	TRN+I+G+X	ND6_1st
2	HKY+I+G+X	ND6_2nd, COX3_2nd, CYTB_2nd
3	GTR+I+G	ND6_3rd
4	TRN+I+G+X	CYTB_1st, ATP6_1st
5	TRN+I+G+X	ATP6_2nd, ND1_2nd
6	GTR+I+G+X	ND5_3rd, ATP6_3rd, COX3_3rd, ND4_3rd, ND3_3rd
7	TRN+I+X	ATP8_1st
8	TRN+I+G+X	ND2_2nd, ATP8_2nd
9	TRN+I+G+X	ATP8_3rd
10	TRN+I+G+X	COX1_1st
11	HKY+I+X	COX1_2nd
12	TRN+I+G+X	COX1_3rd
13	SYM+I+G	COX2_1st, COX3_1st
14	TRN+I+G+X	ND3_2nd, COX2_2nd
15	TRN+I+G+X	COX2_3rd, ND4L_3rd
16	GTR+I+G+X	ND1_3rd, CYTB_3rd
17	GTR+I+G+X	ND4L_1st, ND3_1st, ND1_1st
18	HKY+I+G+X	ND2_1st
19	TRN+I+G+X	ND2_3rd
20	GTR+I+G+X	ND4_1st, ND5_1st
21	GTR+I+G	ND4_2nd, ND4L_2nd
22	GTR+I+G+X	ND5_2nd
